# Supplementary material for: Dexamethasone-Loaded Bioactive Coatings on Medical Grade Stainless Steel Promote Osteointegration
Source: MDPI journal article supplement (doi:10.3390/pharmaceutics13040568), 2021-04-16
Supplement: s1 [file s1]

# Supplementary Materials: Dexamethasone-Loaded Bioactive Coatings on Medical Grade Stainless Steel Promote Osteointegration

Jan Rožanc, Marko Žižek, Marko Milojević, Uroš Maver and Matjaž Finšgar

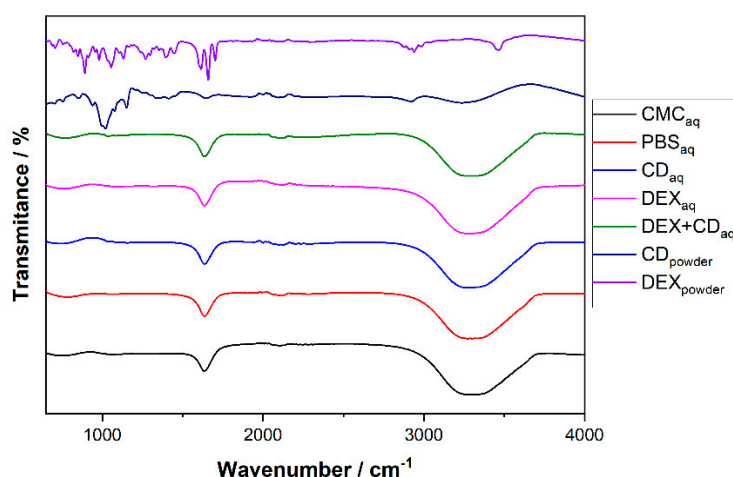

**Figure S1.** ATR-FTIR spectra for comparison of respective components in the multilayer coatings in solution and pure chemicals (powders).

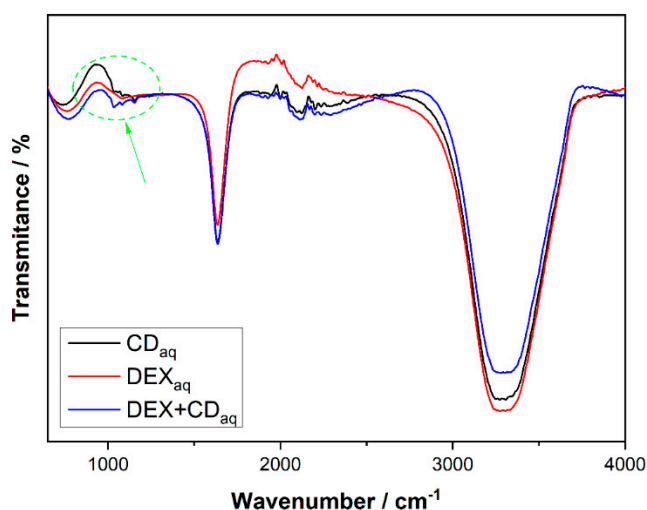

**Figure S2.** Overlay of ATR-FTIR spectra of  $\beta$ -cyclodextrin ( $\beta$ -CD), dexamethasone (DEX), and DEX + CD<sub>aq</sub> mixture, showing combined spectral features around 1000 cm<sup>-1</sup>.

**Publisher's Note:** MDPI stays neutral with regard to jurisdictional claims in published maps and institutional affiliations.

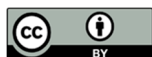

**Copyright:** © 2021 by the authors. Submitted for possible open access publication under the terms and conditions of the Creative Commons Attribution (CC BY) license (<http://creativecommons.org/licenses/by/4.0/>).

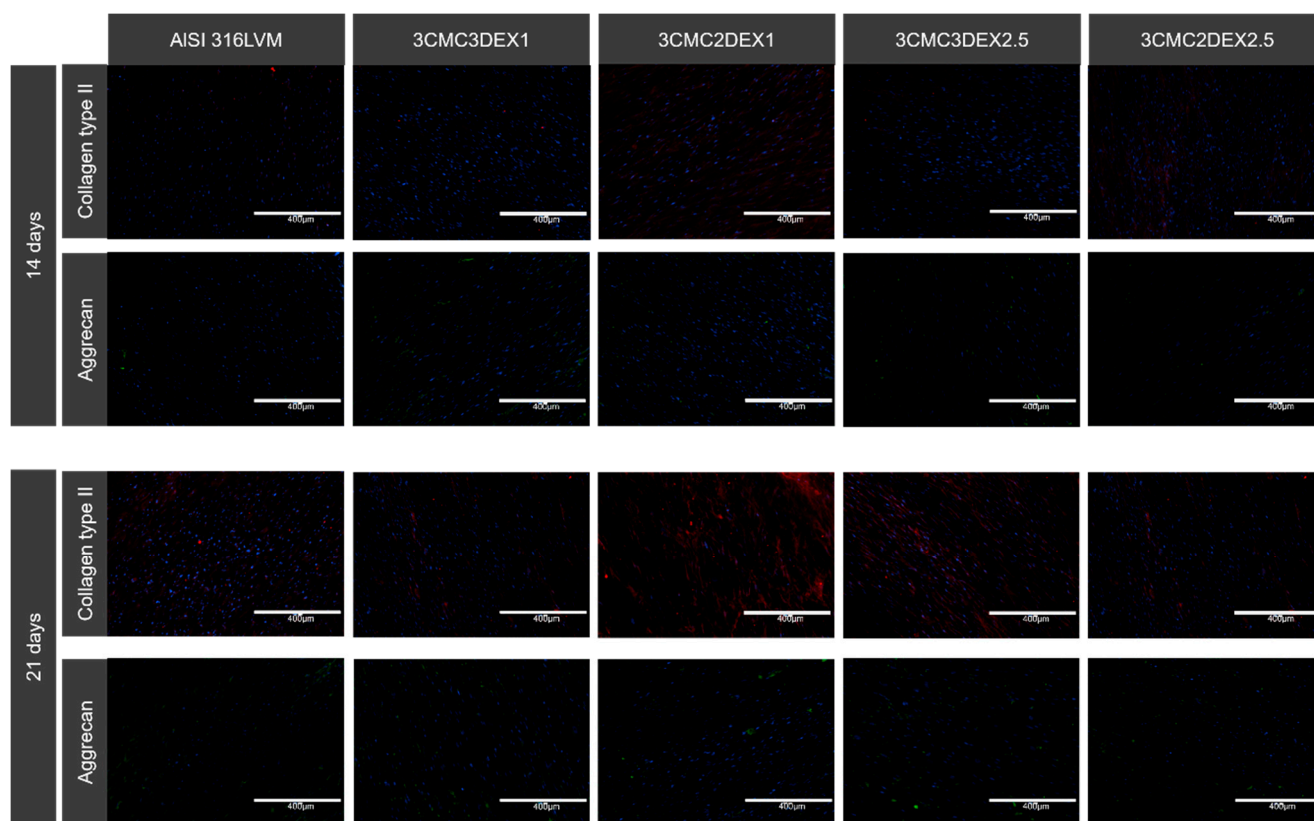

**Figure S3.** Immunocytochemical analysis of chondro-specific markers (Collagen type II and aggrecan) in hMSCs after 14 and 21 days of incubation on different CMC/DEX coated and non-coated substrates.

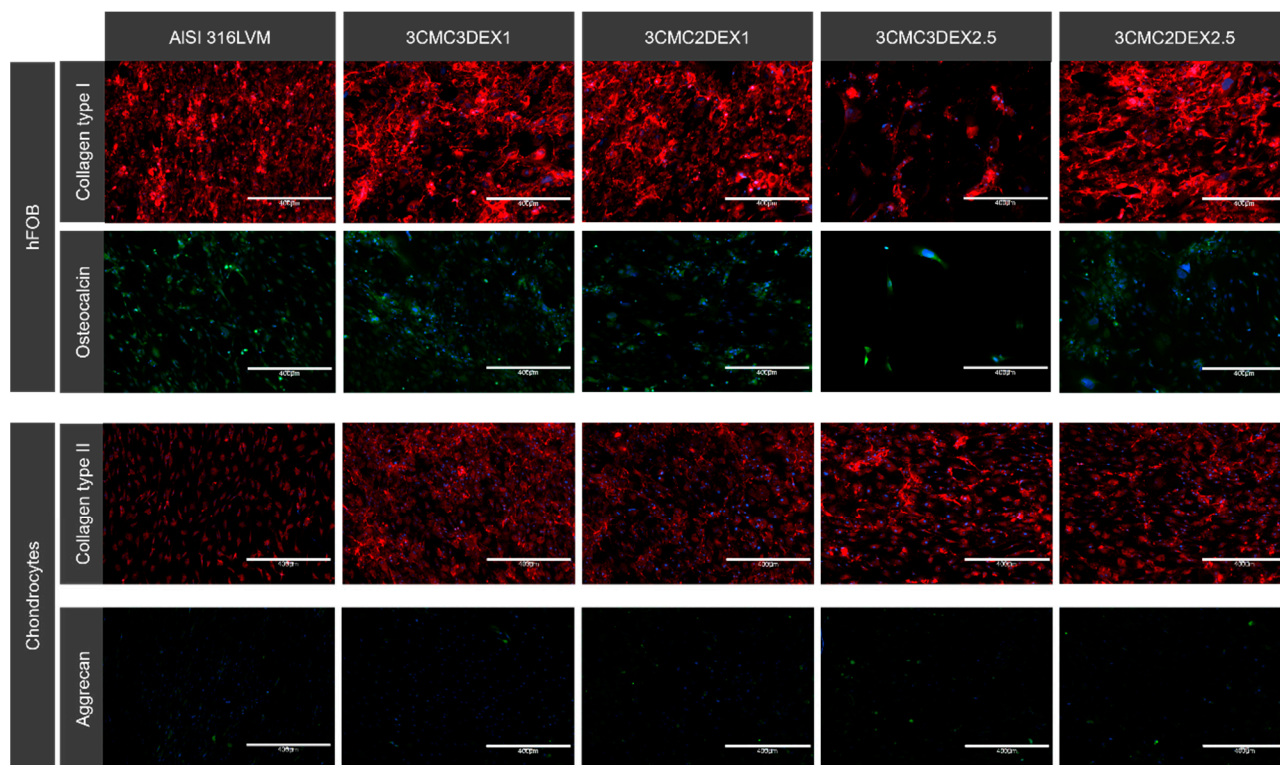

**Figure S4.** Immunocytochemical analysis of hFOB and chondrocytes. The expression of chondrocyte and osteocyte-specific markers was evaluated after 7 days of incubation on different CMC/DEX coated and non-coated substrates.
